# Supplementary material for: Low-temperature pulverization-specific Sargassum horneri extract accelerates wound healing and attenuates inflammation in a mouse burn model
Source: PubMed Central journal article supplement — Anim Cells Syst (Seoul). 2024 Sep 5;28(1):428–38. doi: 10.1080/19768354.2024.2396903 (PMC11378683; doi:10.1080/19768354.2024.2396903), 2024-09-05
Supplement: TACS_A_2396903_SM6365.pdf [file TACS_A_2396903_SM6365.pdf]

1 **Supplemental Information for**

2

3 **Low-temperature Pulverization-specific *Sargassum horneri* Extract Accelerates Wound**

4 **Healing and Attenuates Inflammation in a Mouse Burn Model**

5 **Supplemental Figures**

6 **Figure S1.** Characterization of LPSHE extracted from *S. horneri*

7 **Figure S2.** Damage caused by *S. horneri* along the coast of Korean peninsula

8 **Figure S3.** Histological analysis of immune cells infiltration (H&E staining)

9 **Figure S4.** Histological analysis of immune cells infiltration (IHC)

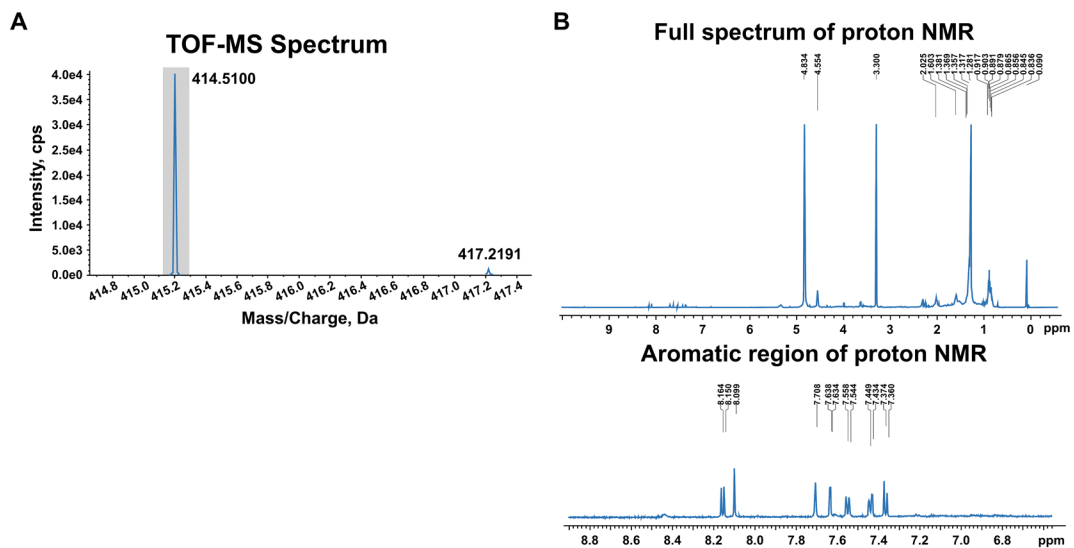

10

11 **Figure S1. Characterization of LPSHE extracted from *S. horneri***

12 (A) LC-MS/MS spectrum of LPSHE at m/z 414.5. (B) Full spectrum and aromatic region of

13 proton NMR analysis of LPSHE.

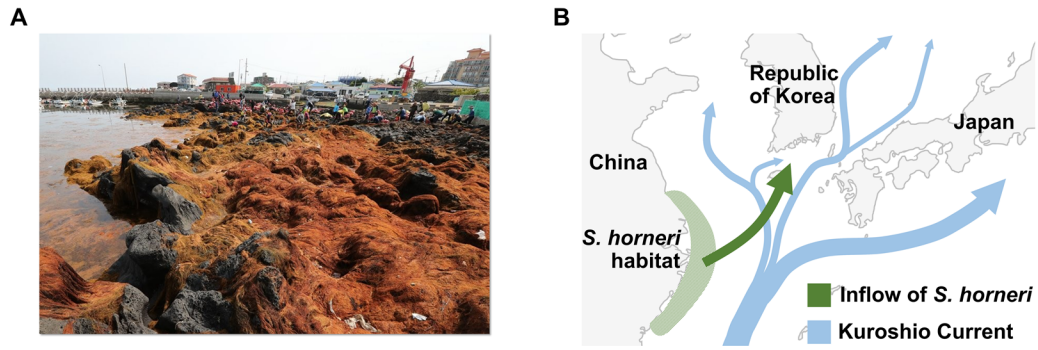

14

15 **Figure S2. Damage caused by *S. horneri* along the coast of Korean peninsula**

16 (A) Representative image of accumulated *S. horneri* along the coastlines in Korean peninsula.

17 (B) The scheme of *S. horneri* inflow through Kuroshio Current.



A

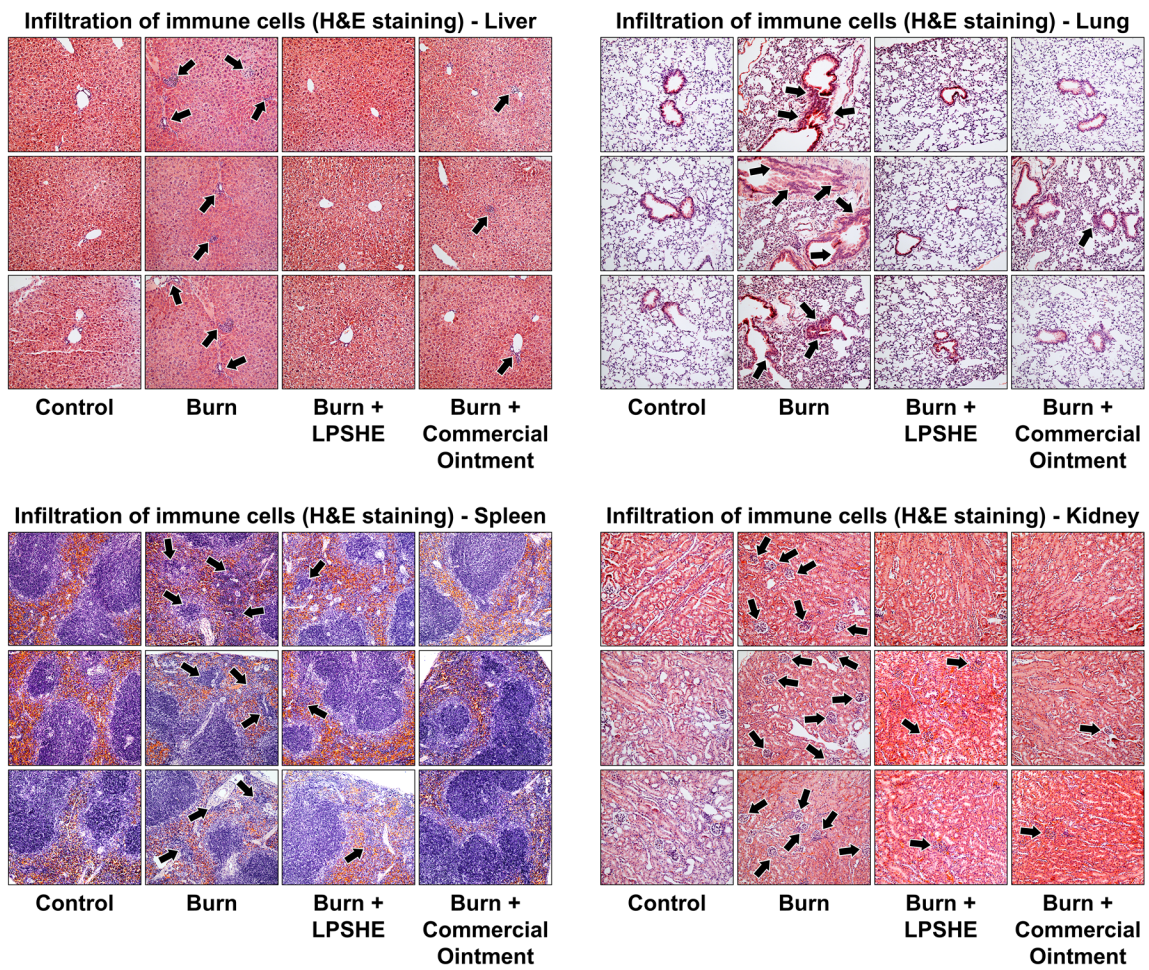

18

19 **Figure S3. Histological analysis of immune cells infiltration (H&E staining)**

20 (A) Raw data of H&E staining results showed that LPSHE or Commercial ointment treatment

21 alleviated burn-induced inflammation. Arrows indicate inflammatory infiltrates (magnification:

22 X200).



A

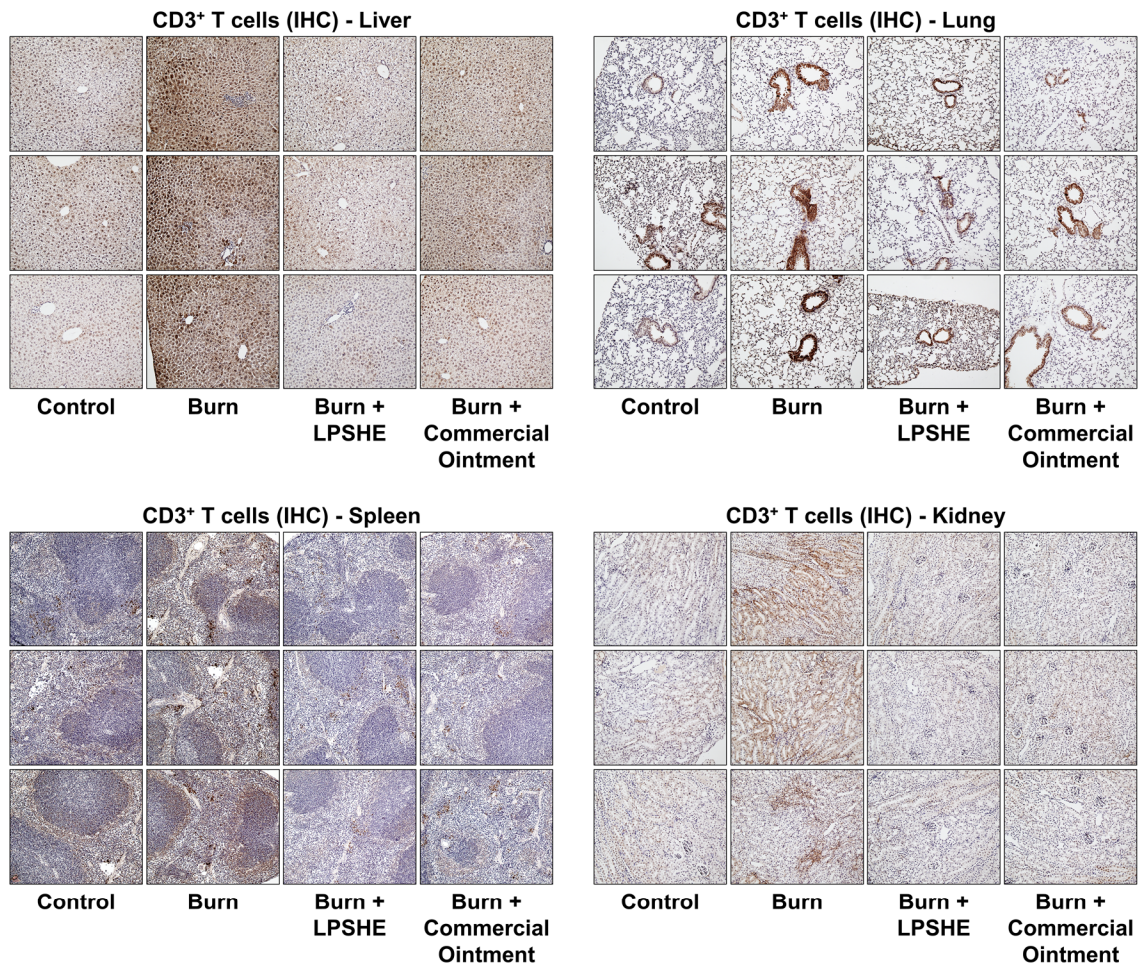

B

Inflammation score

| Burn | LPSHE | Commercial Ointment | Liver_1 | Liver_2 | Liver_3 | Lung_1 | Lung_2 | Lung_3 | Spleen_1 | Spleen_2 | Spleen_3 | Kidney_1 | Kidney_2 | Kidney_3 |
|------|-------|---------------------|---------|---------|---------|--------|--------|--------|----------|----------|----------|----------|----------|----------|
| -    | -     | -                   | 0       | 0       | 0       | 0      | 1      | 0      | 1        | 1        | 1        | 0        | 0        | 0        |
| +    | -     | -                   | 3       | 3       | 3       | 2      | 3      | 2      | 3        | 3        | 3        | 3        | 3        | 3        |
| +    | +     | -                   | 0       | 1       | 0       | 1      | 0      | 1      | 2        | 1        | 1        | 1        | 1        | 1        |
| +    | -     | +                   | 1       | 2       | 0       | 0      | 2      | 1      | 1        | 1        | 1        | 0        | 1        | 1        |

23

24 **Figure S4. Histological analysis of immune cells infiltration (IHC)**

25 (A) Raw data of IHC analysis showed infiltration of CD3<sup>+</sup> T cell in the organs (magnification:

26 X200). (B) Inflammation scores of each organ, evaluated based on the inflammatory infiltration

27 observed in histological analysis (from 0 score to 5 score).
